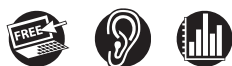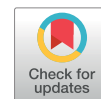

# In Utero Exposure to Maternal Hyperglycemia Increases Childhood Cardiometabolic Risk in Offspring

Diabetes Care 2017;40:679–686 | DOI: 10.2337/dc16-2397

Wing Hung Tam,<sup>1</sup>  
 Ronald Ching Wan Ma,<sup>2,3,4</sup> Risa Ozaki,<sup>2</sup>  
 Albert Martin Li,<sup>5</sup> Michael Ho Ming Chan,<sup>6</sup>  
 Lai Yuk Yuen,<sup>1</sup> Terence Tzu Hsi Lao,<sup>1</sup>  
 Xilin Yang,<sup>7</sup> Chung Shun Ho,<sup>6</sup>  
 Gregory Emanuele Tutino,<sup>2</sup> and  
 Juliana Chung Ngor Chan<sup>2,3,4</sup>

## OBJECTIVE

The objective of this study was to evaluate the effect of maternal hyperglycemia during pregnancy on cardiometabolic risk in offspring during early childhood.

## RESEARCH DESIGN AND METHODS

A total of 970 mothers who had joined the Hyperglycemia and Adverse Pregnancy Outcome study were reevaluated, together with their child born during the study period, 7 years after delivery.

## RESULTS

Offspring born to mothers diagnosed with gestational diabetes mellitus (GDM), as defined by the World Health Organization 2013 GDM criteria, had higher rates of abnormal glucose tolerance (4.7% vs. 1.7%;  $P = 0.04$ ), higher rates of overweight or obesity, greater BMI, higher blood pressure (BP), lower oral disposition index, and a trend toward reduced  $\beta$ -cell function compared with those born to mothers without GDM. For each SD increase in maternal fasting, 1-h, and 2-h glucose levels on oral glucose tolerance tests (OGTTs) between 24 and 32 weeks of the index pregnancy, the risk of abnormal glucose tolerance in the offspring showed a corresponding increase (adjusted odds ratio [OR] 1.85–2.00). The associations were independent of BMI before pregnancy, childhood obesity, or being born large for gestational age. The area under the curve for glucose levels during the five-point OGTT increased to a similar extent in boys and girls with each SD increase in maternal 1-h and 2-h plasma glucose on OGTTs during pregnancy. All three maternal glucose levels were also associated with increased adjusted ORs for childhood overweight or obesity and adiposity among girls, but not boys.

## CONCLUSIONS

Maternal hyperglycemia in pregnancy is independently associated with offspring's risk of abnormal glucose tolerance, obesity, and higher BP at 7 years of age. Its effect on childhood adiposity was apparent only in girls, not boys.

The U.S. Preventive Services Task Force recently approved universal gestational diabetes mellitus (GDM) screening as a preventive measure for type 2 diabetes mellitus (DM) (1). This policy may be more justifiable if the identification of maternal GDM can also help to reduce long-term metabolic consequences among offspring. However, the follow-up analyses of both the Australian Carbohydrate Intolerance Study in Pregnant Women (ACHOIS) and the Maternal-Fetal Medicine Units (MFMU)

<sup>1</sup>Department of Obstetrics and Gynaecology, Chinese University of Hong Kong, Hong Kong

<sup>2</sup>Department of Medicine and Therapeutics, Chinese University of Hong Kong, Hong Kong

<sup>3</sup>Hong Kong Institute of Diabetes and Obesity, Chinese University of Hong Kong, Hong Kong

<sup>4</sup>Li Ka Shing Institute of Health Sciences, Chinese University of Hong Kong, Hong Kong

<sup>5</sup>Department of Paediatrics, Chinese University of Hong Kong, Hong Kong

<sup>6</sup>Department of Chemical Pathology, Chinese University of Hong Kong, Hong Kong

<sup>7</sup>Department of Epidemiology and Biostatistics, School of Public Health, Tianjin Medical University, Tianjin, China

Corresponding author: Wing-Hung Tam, tamwh@cuhk.edu.hk.

Received 10 November 2016 and accepted 10 February 2017.

This article contains Supplementary Data online at <http://care.diabetesjournals.org/lookup/suppl/doi:10.2337/dc16-2397/-/DC1>.

This article is featured in a podcast available at <http://www.diabetesjournals.org/content/diabetes-core-update-podcasts>.

© 2017 by the American Diabetes Association. Readers may use this article as long as the work is properly cited, the use is educational and not for profit, and the work is not altered. More information is available at <http://www.diabetesjournals.org/content/license>.

trials failed to show a reduction in childhood obesity and glucose intolerance with antenatal glycemic treatment administered to mothers (2,3). Nevertheless, neither trial was powered to address long-term metabolic consequences in offspring.

The association of in utero hyperglycemia with fetal programming was first described in the Native American Pima population, among whom is found a high prevalence of obesity, type 2 DM, and GDM. Offspring born to mothers who had DM during pregnancy had a considerably higher risk of DM and obesity than those born to mothers who developed DM after pregnancy (4,5). Similarly, offspring exposed to maternal DM during gestation had a higher risk of DM than their siblings born before the onset of DM in the mother, after eliminating confounding effects of genetic variation and similar lifestyle characteristics (6). However, whether similar putative programming effects occur in mild maternal hyperglycemia in other populations remains uncertain. Earlier studies that examined the risk association between maternal GDM and susceptibility to DM in the offspring were limited by their retrospective designs and lack of control groups (7–9). More than 10 prospective cohort studies have reported the effects of maternal GDM on offsprings' risks of obesity or glucose tolerance, with inconsistent results, in part because of differences in the definitions of maternal hyperglycemia and GDM and in adjustments for confounding factors (10–21). Importantly, all mothers diagnosed with GDM had inevitably received interventions to normalize the glycemic level during pregnancy, except in one study (17,18). Furthermore, postnatal education regarding and investigation for maternal GDM during repeat follow-up visits also confounded the data interpretation and conclusions. While many experts reckon that exposure to in utero hyperglycemia will increase the future risk of obesity and type 2 DM in offspring, others argue that the apparent risk association might be explained by confounding factors (22).

In this study we examined the effect of maternal hyperglycemia on childhood cardiometabolic health in offspring born to a cohort of women in the Hyperglycemia and Adverse Pregnancy Outcome

(HAPO) study. Mothers in this cohort had never received any prior antenatal or postnatal intervention, and their glycemic status at the index pregnancy remained undisclosed.

## RESEARCH DESIGN AND METHODS

### Participants

The participants were mothers who were ethnic Chinese seen at the Hong Kong study center from the original HAPO study, along with their children born from the index pregnancy. Details of the HAPO study have been described previously (23). All women underwent a standard 75-g oral glucose tolerance test (OGTT) between 24 and 32 weeks of gestation. Data concerning smoking and alcohol use, history of DM and hypertension among first-degree relatives, and demographic characteristics were collected using standardized questionnaires (23). Blood was collected between 34 and 37 weeks of gestation for the evaluation of random plasma glucose (PG) levels, as a safety measure to identify women with hyperglycemia above a pre-defined threshold. The OGTT results were unblinded if the 2-h PG level was diagnostic of DM (i.e.,  $>11.1$  mmol/L), the fasting PG level exceeded 5.8 mmol/L, the random PG level at 34–37 weeks' gestation was  $\geq 8.9$  mmol/L, or any PG level was  $<2.5$  mmol/L. Eligible subjects were invited to attend a follow-up assessment at the Prince of Wales Hospital between 2009 and 2013. Non-Chinese women and those whose OGTT results were unblinded for the above reasons were excluded from the study.

### Study Procedures

Both the mother and her child were scheduled for a follow-up visit in the morning, after at least 8 h of fasting, when the child was around 7 years of age. Assessments were rescheduled for mothers who were pregnant or if either the mother or the child had an acute illness at the time of the visit. Research staff explained the study objective and procedures to both the mother and the child, and written informed consent was obtained from parents or legal guardians. The study was approved by the Chinese University of Hong Kong Clinical Research Ethics Committee.

### Demographic Data

Demographic data on personal medical history, family history, dietary habits, and

physical activity were collected using structured questionnaires. The children's physical activity was assessed by the Chinese University of Hong Kong: Physical Activity Rating for Children and Youth, which is a one-item activity rating modified from the Jackson Activity Coding and the Godin-Shephard Activity Questionnaire for adolescents (24,25). This rating adopted an 11-point score to grade levels of physical activity, ranging from no exercise at all (0) to vigorous exercise on most days (10), taking into consideration the frequency, duration, and intensity of activity.

Standing height without shoes was measured to the nearest 0.1 cm using a Harpenden stadiometer (Holtain Ltd., Crymch, U.K.); body weight (with light clothing) was measured to the nearest 0.1 kg (Tanita physician digital scale, model no. TBF 410; Tanita Corp., Tokyo, Japan). Waist circumference, at the midpoint between the lower ridge of the ribs and the top of the iliac crest, was measured to the nearest 0.1 cm using a nonelastic flexible tape. Hip circumference was measured at the broadest circumference below the waist. We measured skinfold thickness at four sites on the right side (biceps, triceps, subscapular, and suprailiac) using a Holtain Tanner/Whitehouse skinfold caliper (Holtain Ltd.). Blood pressure (BP) was measured three times in the non-dominant arm using an Omron T5 BP monitor (Omron Healthcare Co. Ltd., Kyoto, Japan), at 1-min intervals, after 5 min of rest. The mean readings were used for analysis. All subjects were advised to abstain from smoking and drinking alcohol, tea, or coffee on the day before the follow-up evaluation.

### Biochemical Tests

All mothers underwent a 75-g OGTT at two time points, unless they were treated with antidiabetes drugs. Children had an OGTT at five time points after receiving a glucose load of 1.75 g/kg body weight, or a 75-g glucose load if they weighed  $\geq 42.8$  kg. Venous blood samples were collected at baseline (fasting) and at 15, 30, 60, and 120 min following the glucose load and used to measure PG and insulin. Fasting blood was also collected to determine C-peptide levels, lipid profile, and renal and liver function. If the child could not complete the OGTT or vomited during

the procedure, the test was discontinued and not repeated.

PG was measured with the hexokinase method, using an automated analyzer (Hitachi 911; Boehringer Mannheim, Mannheim, Germany). Both the intra- and interassay coefficients of variation for glucose were 2% at 6.6 mmol/L. Plasma insulin and C-peptide levels were analyzed using an immunoassay analyzer (Immulite 1000 Immunoassay System; Siemens, Munich, Germany), with the lowest detection limits at 2.0 mIU/L and 0.1 µg/L, respectively. The interassay coefficients of variation for insulin were 4.8% and 4.4% at 9.8 and 45.4 mIU/L, respectively; those for C-peptide were 3.6%, 3.1%, and 4.5% at 0.68, 3.0, and 6.7 µg/L, respectively. Plasma triglyceride and both HDL and LDL cholesterol levels were measured with enzymatic methods, using a DP Modular Analytics system (Roche Diagnostics, Indianapolis, IN).

### Outcome Measures

The primary outcome was the rate of abnormal glucose tolerance in the offspring of mothers retrospectively classified as having GDM based on the latest World Health Organization definition (26). The secondary outcomes included offsprings' insulin sensitivity, pancreatic β-cell function, oral disposition indices, BMI, BP, overweight or obesity, adiposity, and prehypertension and hypertension status. We defined DM, impaired glucose tolerance (IGT), and impaired fasting glucose (IFG) according to the American Diabetes Association diagnostic criteria. Abnormal glucose tolerance was defined as the presence of IFG, IGT, or DM. Insulin sensitivity was calculated using the Matsuda insulin sensitivity index (ISI) (27). Pancreatic β-cell function was determined using the formula  $AUC(I) \div AUC(G)$  (mmol/L) (28), where  $AUC(I)$  and  $AUC(G)$  are the area under the plasma insulin level–time curve and the PG level–time curve, respectively, from 0 to 120 min in the OGTT; the HOMA of β-cell function also was used to assess pancreatic β-cell function (29). The insulinogenic index, a surrogate for first-phase insulin secretion, of the OGTT was estimated using the formula  $[(I^{30} - I^0) \div (G^{30} - G^0)]$  (30), where  $G^0$  and  $G^{30}$  are the fasting and 30-min PG levels, and  $I^0$  and  $I^{30}$  are the fasting

and 30-min insulin levels, respectively. The oral disposition index, which assesses the acute insulin response in relation to the level of insulin sensitivity, was defined as  $(I^{30} - I^0) \div (G^{30} - G^0) \times \text{Matsuda ISI}$  (31).

Obesity (BMI ≥95th percentile) and overweight (BMI ≥85th to <95th percentiles) were defined according to the Centers for Disease Control and Prevention on the basis of age- and sex-specific BMI percentiles for the local Chinese population (32). Adiposity was defined as the sum of skinfold thickness (at four sites) at or above the 90th percentile, whereas prehypertension and hypertension were defined according to the age-, sex-, and height-specific reference ranges from the National High Blood Pressure Education Program Working Group on High Blood

Pressure in Children and Adolescents (30).

### Statistical Analysis

Data are expressed as mean ± SD or counts with proportions. Between-group differences were compared using the Student *t* test and the  $\chi^2$ /Fisher exact tests, as appropriate. Univariable and multivariable linear regression analyses were used to assess the associations between continuous variables. Multivariable logistic regression analysis was used to obtain adjusted odds ratios (ORs) with 95% CIs, with the forced entry of potential confounders. Plasma insulin and C-peptide levels below the detection limits were corrected to the lowest detectable levels. All statistical analyses were performed in SPSS version 22 (SPSS, Chicago, IL). *P* values <0.05

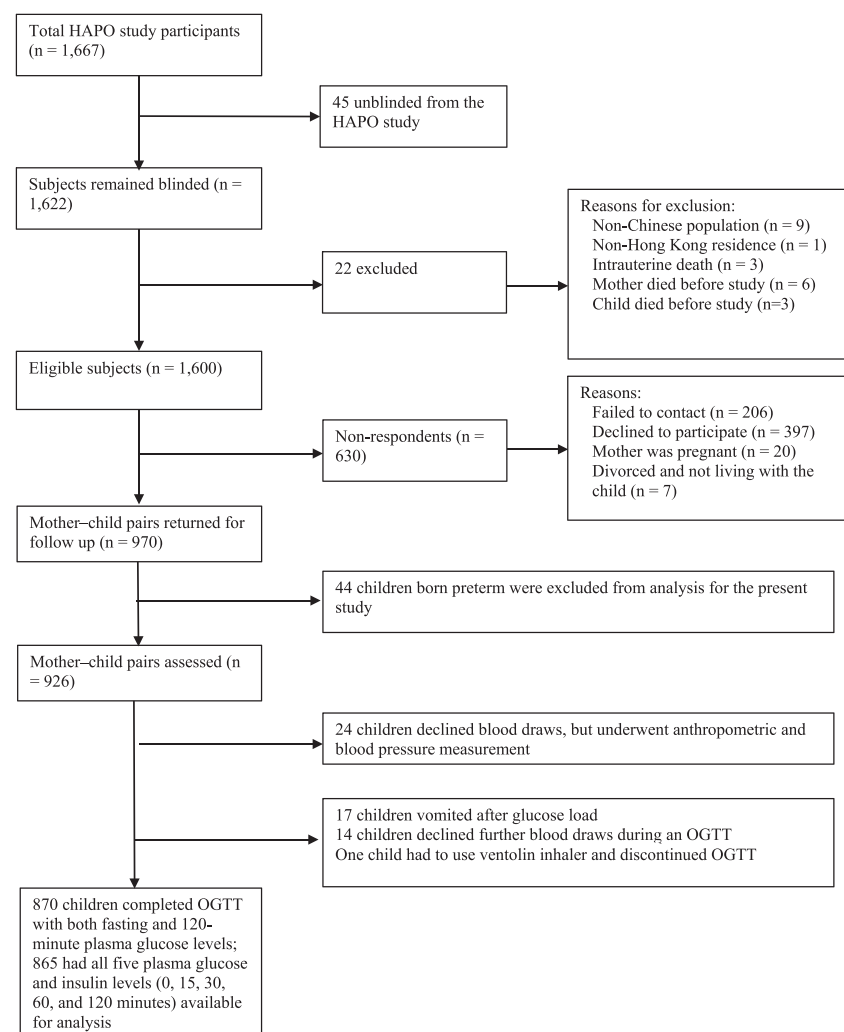

**Figure 1**—Flowchart of HAPO study participants from the Hong Kong field center and eligible subjects in the follow-up study.

were used to indicate significance for two-tailed statistical test results. There is no epidemiological data of childhood abnormal glucose tolerance in our population. Assuming maternal GDM increases in prevalence from a background rate of 1% to 4%, 1,532 subjects are required to obtain a power of 80% at a 5% significance level.

## RESULTS

A total of 970 eligible mother-child pairs (60.6%) returned for a follow-up assessment. Blood was successfully collected from 902 children, of whom 96% completed sampling at five time points (Fig. 1). Mothers who returned for follow-up were older and more commonly affected by GDM at the index pregnancy, whereas their children had higher C-peptide levels in cord blood serum at birth.

Mothers who had GDM during the index pregnancy were older and had a higher BMI before pregnancy compared with their peers with normal glucose tolerance; they also had a higher rate of DM and prediabetes at the time of follow-up (Supplementary Table 1). Their children were also heavier and had greater adiposity and higher C-peptide levels in umbilical cord blood at delivery.

Compared with the children of mothers without GDM, the 7-year-old offspring of mothers with GDM (OGDM) had higher 30- and 60-min PG levels, larger AUC(G) at the OGTT, higher rates of abnormal glucose tolerance, lower oral disposition indices, and a trend toward lower insulinogenic indices at 30 min (Table 1). The OGDM also had higher BMI, a higher rate of overweight or obesity, and a higher BP, but there was no difference in the rates of prehypertension or hypertension compared with their peers born to mothers without GDM. Higher rates of overweight or obesity and adiposity were only observed among girls, not boys, among OGDM, whereas a higher AUC(G) was observed for both sexes. There were no significant differences in the history of breastfeeding, dietary habits, and exercise levels between the two groups.

Table 2 shows the associations of maternal glycemia (fasting, 1-h, and 2-h PG levels during the OGTT in the index pregnancy) with the offsprings' cardiometabolic risk factors. The adjusted ORs of

**Table 1—Characteristics and cardiometabolic outcomes at 7 years of age between the offspring of mothers with normal glucose tolerance and mothers with GDM**

|                                                      | Offspring                     |                               | P value |
|------------------------------------------------------|-------------------------------|-------------------------------|---------|
|                                                      | Mothers with NGT<br>(n = 794) | Mothers with GDM<br>(n = 132) |         |
| Anthropometry                                        |                               |                               |         |
| Children's age (years), median (interquartile range) | 7.0 (6.7–7.2)                 | 6.9 (6.6–7.2)                 | 0.03    |
| BMI (kg/m <sup>2</sup> )*                            | 15.0 ± 2.3                    | 15.3 ± 2.1                    | 0.04    |
| BMI percentile                                       | 42.6 ± 31.1                   | 50.9 ± 32.0                   | 0.01    |
| Obesity (BMI ≥95th percentile)                       | 67 (8.4)                      | 9 (6.8)                       | 0.53    |
| Overweight or obesity (BMI ≥85th percentile)         |                               |                               |         |
| Overall                                              | 121 (15.3)                    | 30 (22.7)                     | 0.03    |
| Boys                                                 | 73 (17.2)                     | 13 (22.8)                     | 0.30    |
| Girls                                                | 48 (13.0)                     | 17 (22.7)                     | 0.03    |
| Waist-to-hip ratio*                                  | 0.84 ± 0.05                   | 0.84 ± 0.04                   | 0.64    |
| Sum of skinfold thickness (mm)*                      |                               |                               |         |
| Overall                                              | 35.8 ± 17.4                   | 38.7 ± 15.7                   | 0.07    |
| Boys                                                 | 35.2 ± 18.2                   | 35.6 ± 15.4                   | 0.71    |
| Girls                                                | 36.4 ± 16.5                   | 41.0 ± 15.5                   | 0.03    |
| Glycemia and insulin                                 |                               |                               |         |
| PG (mmol/L)                                          |                               |                               |         |
| Fasting                                              | 4.57 ± 0.35                   | 4.64 ± 0.49                   | 0.12    |
| 15 min                                               | 7.03 ± 1.16                   | 7.20 ± 1.30                   | 0.14    |
| 30 min                                               | 7.54 ± 1.49                   | 7.99 ± 1.58                   | 0.002   |
| 60 min                                               | 5.87 ± 1.51                   | 6.30 ± 1.66                   | 0.004   |
| 120 min                                              | 5.29 ± 0.97                   | 5.39 ± 0.96                   | 0.26    |
| AUC(G)                                               |                               |                               |         |
| Overall                                              | 732 ± 118                     | 768 ± 121                     | 0.002   |
| Boys                                                 | 731 ± 118                     | 769 ± 115                     | 0.03    |
| Girls                                                | 734 ± 119                     | 766 ± 127                     | 0.04    |
| Children's glycemic status†                          |                               |                               |         |
| IFG and/or IGT                                       | 13 (1.7)                      | 5 (3.9)                       | 0.04    |
| DM                                                   | 0 (0)                         | 1 (0.8)                       | 0.04    |
| Fasting plasma insulin (mIU/L)                       | 4.07 ± 5.33                   | 3.77 ± 3.57                   | 0.53    |
| Fasting C-peptide (μg/L)                             | 0.38 ± 0.43                   | 0.32 ± 0.37                   | 0.14    |
| Matsuda ISI                                          | 16.2 ± 8.9                    | 15.0 ± 8.3                    | 0.14    |
| HOMA-BCF                                             | 77.6 ± 72.8                   | 71.4 ± 65.2                   | 0.38    |
| Insulinogenic index at 30 min                        | 81.0 ± 94.2                   | 67.8 ± 65.0                   | 0.05    |
| Oral disposition index                               | 7.98 ± 9.43                   | 6.62 ± 5.95                   | 0.04    |
| Lipid profile                                        |                               |                               |         |
| Total cholesterol (mmol/L)                           | 4.47 ± 0.74                   | 4.52 ± 0.68                   | 0.41    |
| HDL cholesterol (mmol/L)                             | 1.66 ± 0.35                   | 1.65 ± 0.31                   | 0.73    |
| LDL cholesterol (mmol/L)                             | 2.47 ± 0.64                   | 2.53 ± 0.61                   | 0.33    |
| Triglyceride (mmol/L)                                | 0.74 ± 0.33                   | 0.78 ± 0.34                   | 0.24    |
| Dyslipidemia‡                                        | 63 (8.2)                      | 11 (8.4)                      | 0.94    |
| BP (mmHg)                                            |                               |                               |         |
| SBP*                                                 | 102 ± 8.9                     | 104 ± 8.7                     | 0.01    |
| DBP*                                                 | 62 ± 7.9                      | 63 ± 8.1                      | 0.06    |
| SBP at age-, sex-, and height-specific percentile    | 60 ± 24                       | 66 ± 22                       | 0.01    |
| DBP at age-, sex-, and height-specific percentile    | 60 ± 22                       | 64 ± 22                       | 0.02    |
| Hypertension (BP ≥95th percentile)                   | 63 (8.0)                      | 11 (8.3)                      | 0.89    |
| Prehypertension (BP 90th to <95th percentile)        | 50 (6.3)                      | 11 (8.3)                      | 0.51    |

Data are mean ± SD or n (%), unless otherwise indicated. BCF, β-cell function; DBP, diastolic blood pressure; NGT, normal glucose tolerance; SBP, systolic blood pressure. \*Between-group comparison by ANCOVA after adjustment for age and/or sex as appropriate. †χ<sup>2</sup> test based on the rate of abnormal glucose tolerance. ‡Triglyceride ≥1.7 mmol/L or LDL cholesterol ≥3.4 mmol/L.

abnormal glucose tolerance in offspring increased by 1.85–2.00 with every 1-SD increase for all three maternal glycemic

levels. In addition, every 1-SD increase in maternal glycemic levels was associated with an increase in the odds of

**Table 2—Unadjusted and adjusted ORs for associations between maternal glycemic level during pregnancy and offspring's cardiometabolic characteristics at 7 years of age**

|                                                               | Maternal fasting PG |                   | Maternal 1-h PG   |                   | Maternal 2-h PG   |                   | GDM                |                   |
|---------------------------------------------------------------|---------------------|-------------------|-------------------|-------------------|-------------------|-------------------|--------------------|-------------------|
|                                                               | Unadjusted          | Adjusted          | Unadjusted        | Adjusted          | Unadjusted        | Adjusted          | Unadjusted         | Adjusted          |
| <b>Abnormal glucose tolerance*</b>                            |                     |                   |                   |                   |                   |                   |                    |                   |
| Overall                                                       | 1.86 (1.24–2.77)†   | 1.85 (1.20–2.86)‡ | 1.81 (1.15–2.85)† | 1.95 (1.18–3.22)‡ | 1.76 (1.15–2.69)‡ | 2.00 (1.21–3.31)‡ | 2.90 (1.08–7.77)†  | 3.08 (1.04–9.13)† |
| Boys                                                          | 1.71 (1.02–2.89)†   | 1.68 (0.95–2.98)  | 1.79 (1.02–3.13)† | 1.82 (0.95–3.47)  | 1.86 (1.05–3.31)† | 1.82 (0.92–3.58)  | 4.17 (1.21–14.38)† | 3.89 (0.96–15.81) |
| Girls                                                         | 2.12 (1.12–4.02)†   | 2.56 (1.16–5.68)† | 1.96 (0.89–4.30)  | 2.47 (0.98–6.18)  | 1.75 (0.91–3.37)  | 2.04 (0.98–4.26)  | 1.95 (0.37–10.28)  | 2.34 (0.41–13.50) |
| <b>Overweight or obesity (BMI ≥85th percentile)§</b>          |                     |                   |                   |                   |                   |                   |                    |                   |
| Overall                                                       | 1.15 (0.97–1.37)    | 1.11 (0.92–1.34)  | 1.28 (1.07–1.52)‡ | 1.26 (1.04–1.53)† | 1.24 (1.04–1.47)† | 1.25 (1.03–1.51)† | 1.63 (1.04–2.56)†  | 1.59 (0.97–2.59)  |
| Boys                                                          | 0.98 (0.78–1.25)    | 0.93 (0.72–1.20)  | 1.29 (1.02–1.64)† | 1.25 (0.97–1.62)  | 1.16 (0.91–1.49)  | 1.09 (0.84–1.43)  | 1.42 (0.73–2.77)   | 1.25 (0.60–2.61)  |
| Girls                                                         | 1.38 (1.07–1.78)†   | 1.43 (1.07–1.90)† | 1.27 (0.98–1.64)  | 1.33 (0.99–1.79)  | 1.33 (1.04–1.69)† | 1.44 (1.09–1.89)‡ | 1.96 (1.06–3.64)†  | 2.16 (1.09–4.27)† |
| <b>Adiposity (sum of skinfold ≥90th percentile)  </b>         |                     |                   |                   |                   |                   |                   |                    |                   |
| Overall                                                       | 1.30 (1.06–1.60)†   | 1.33 (1.05–1.69)† | 1.36 (1.10–1.68)‡ | 1.36 (1.08–1.73)† | 1.23 (0.99–1.51)  | 1.28 (1.00–1.64)† | 1.16 (0.65–2.09)   | 1.02 (0.52–1.98)  |
| Boys                                                          | 1.10 (0.82–1.46)    | 1.12 (0.80–1.56)  | 1.20 (0.90–1.60)  | 1.14 (0.82–1.57)  | 1.04 (0.77–1.41)  | 1.01 (0.71–1.45)  | 0.76 (0.29–1.99)   | 0.45 (0.13–1.57)  |
| Girls                                                         | 1.60 (1.18–2.17)‡   | 1.79 (1.24–2.57)‡ | 1.60 (1.16–2.19)‡ | 1.76 (1.21–2.56)‡ | 1.45 (1.08–1.95)† | 1.55 (1.09–2.20)† | 1.68 (0.78–3.61)   | 1.63 (0.70–3.78)  |
| <b>Prehypertensive or hypertensive (BP ≥90th percentile)¶</b> |                     |                   |                   |                   |                   |                   |                    |                   |
| Overall                                                       | 1.11 (0.92–1.33)    | 1.07 (0.89–1.30)  | 1.25 (1.04–1.50)† | 1.22 (1.01–1.48)† | 1.19 (1.00–1.43)  | 1.17 (0.96–1.41)  | 1.20 (0.73–1.97)   | 1.15 (0.69–1.92)  |
| Boys                                                          | 1.11 (0.86–1.43)    | 1.06 (0.81–1.38)  | 1.20 (0.93–1.55)  | 1.16 (0.89–1.53)  | 1.18 (0.90–1.55)  | 1.16 (0.87–1.54)  | 0.97 (0.44–2.14)   | 0.99 (0.44–2.22)  |
| Girls                                                         | 1.11 (0.86–1.43)    | 1.08 (0.83–1.42)  | 1.30 (1.01–1.68)† | 1.28 (0.97–1.70)  | 1.20 (0.94–1.53)  | 1.18 (0.91–1.53)  | 1.39 (0.73–2.67)   | 1.29 (0.65–2.54)  |

Data are OR (95% CI). ORs were for an increase of 1 SD in maternal glucose level (0.3 mmol/L for fasting PG, 1.6 mmol/L for 1-h PG, 1.3 mmol/L for 2-h PG). Corresponding ORs were then calculated for the selected sex. All ORs were adjusted for maternal age (at expected date of confinement), parity (at the index pregnancy), BMI before pregnancy, and children's exercise level. In addition to \*current maternal and paternal DM status, children's age, and/or sex, as appropriate; ‡current maternal and paternal DM status; †current maternal and paternal DM status and children's age, height, and/or sex, as appropriate; or ¶current maternal hypertensive status. †P value between 0.01 and < 0.05. ‡P < 0.01.

overweight or obesity and of adiposity, but the association was confined to girls. The maternal 1-h PG level also was associated with increased odds of the offspring having prehypertension or hypertension.

Multivariable linear regression analysis showed children's AUC(G) at the OGTT significantly increased per 1-SD increase in maternal 1-h and 2-h PG at the OGTT, respectively, in boys (OR 19.1 [95% CI 7.5–30.6],  $P = 0.001$  and 23.6 [11.4–35.8],  $P < 0.001$ ) and girls (17.8 [5.1–30.4],  $P = 0.006$  and 23.8 [11.8–35.9],  $P < 0.001$ ) after adjusting for the same confounding factors as for abnormal glucose tolerance (listed in Table 2).

We also examined the association of abnormal glucose tolerance in offspring with different maternal and neonatal characteristics, as well as other potential risk factors at the follow-up assessment (Supplementary Table 2). None of the antenatal (advanced maternal age [ $\geq 35$  years], obesity before pregnancy, gestational weight gain), neonatal (macrosomia, large for gestational age, small for gestational age), or parental characteristics (mother's diabetes status, maternal obesity) were associated with children's abnormal glucose tolerance. However, the children's adiposity (OR 3.24 [95% CI 1.14–9.21],  $P = 0.03$ ), but not overweight or obesity, was associated with abnormal glucose tolerance at 7 years of age. We also did not find any association between being born large for gestational age and childhood overweight or obesity in this cohort.

In additional analyses including further adjustment for being born large for gestational age, adiposity at birth, overweight or obesity, or adiposity at the time of follow-up, maternal glycemic levels and maternal GDM remained significantly associated with an increased risk of abnormal glucose tolerance in the offspring (Table 3).

## CONCLUSIONS

In this prospective follow-up study of mothers and offspring from the HAPO cohort, we observed a graded effect of maternal glycemic levels during pregnancy on the offspring's risk of abnormal glucose tolerance, obesity, and adiposity at 7 years of age, after adjusting for antenatal, neonatal, and postnatal confounders. Consistent with a



**Table 3—The association of offspring diagnosed with abnormal glucose tolerance with maternal glucose levels at pregnancy during OGTT and diagnosed with GDM at pregnancy**

|                             | Children's abnormal glucose tolerance after adjustment for parental and children's characteristics* and the following parameter |                  |                  |                  |
|-----------------------------|---------------------------------------------------------------------------------------------------------------------------------|------------------|------------------|------------------|
|                             | Fasting PG                                                                                                                      | 1-h PG           | 2-h PG           | GDM              |
| Adiposity at birth†         | 1.90 (1.15–3.15)                                                                                                                | 2.02 (1.17–3.49) | 2.25 (1.30–3.88) | 4.13 (1.33–12.8) |
| LGA at birth‡               | 1.84 (1.17–2.87)                                                                                                                | 1.92 (1.15–3.19) | 1.99 (1.20–3.30) | 3.00 (1.01–8.87) |
| Adiposity at 7 years§       | 1.80 (1.17–2.78)                                                                                                                | 1.91 (1.16–3.14) | 1.97 (1.19–3.27) | 3.13 (1.05–9.30) |
| Overweight/obese at 7 years | 1.85 (1.20–2.85)                                                                                                                | 1.90 (1.15–3.14) | 1.96 (1.18–3.25) | 2.99 (1.00–8.88) |

Data are OR (95% CI). LGA, large for gestational age. \*ORs adjusted for maternal age (at expected date of confinement), parity (at index pregnancy), BMI before pregnancy, current maternal and paternal DM status, children's exercise level, children's age, and sex, in addition to †sum of skinfold thickness  $\geq 90$ th percentile at birth; ‡birth weight  $\geq 90$ th percentile; §sum of skinfold thickness  $\geq 90$ th percentile at 7 years of age; ||BMI  $\geq 85$ th percentile at 7 years of age, for an increase of 1 SD in maternal glucose level (0.3 mmol/L for fasting PG, 1.6 mmol/L for 1-h PG, 1.3 mmol/L for 2-h PG).

previous report, the graded effect of maternal hyperglycemia on obesity and adiposity in offspring was most evident among girls (33). On the other hand, Lingwood et al. (34) reported that boys were more immediately sensitive to maternal hyperglycemia in developing neonatal adiposity. In the MFMU trial, male infants born to mothers who received treatment had lower birth weight and fat mass than those born to mothers who received no treatment, but this was not apparent in female infants (35). To the contrary, at 5–10 years of age, those girls whose mothers received antenatal treatment did have lower fasting PG levels, insulin resistance, BP, and rate of IFG (3). These findings suggest that boys and girls might differ in the immediate and latent responses of adiposity and glucose metabolism to maternal hyperglycemia.

Because of the low prevalence of abnormal glucose tolerance in this young population, our relatively small sample size, and the short duration of observation, we were not able to detect sex differences in abnormal glucose tolerance. Nevertheless, we discovered a continuous association between maternal glycemic levels during pregnancy and glycemic levels of offspring, as reflected by the AUC(G) at the OGTT, to the same extent in both sexes, independent of confounders including maternal age, parity, obesity, children's exercise level, and parental DM status. We also observed a lower oral disposition index and a trend toward reduced pancreatic  $\beta$ -cell function among the OGDM; such may explain the mechanism underlying abnormal glucose tolerance and hyperglycemia in offspring. We also explored whether the apparent association between in utero

hyperglycemia and children's glucose intolerance could be related to being born large for gestational age or having childhood obesity. First, we did not observe any associations of overweight or obesity and adiposity of children at follow-up with their weight, adiposity, or cord blood C-peptide levels at birth. Second, only childhood adiposity, and not overweight or obesity, was shown to be associated with abnormal glucose tolerance in the children. Finally, despite adjusting for offsprings' BMI and adiposity (either at birth or at the time of follow-up), all three glycemic levels during pregnancy and GDM status remained significantly associated with an increased risk of abnormal glucose tolerance in the offspring. This observation suggests that the association between maternal glucose levels and abnormal glucose tolerance in offspring is not necessarily mediated through macrosomia at birth or childhood obesity.

The association between maternal glycemia in pregnancy and prehypertension or hypertension in the children was only observed for maternal glucose at the first hour of the OGTT during pregnancy. This could be due to the low prevalence of hypertension among this young age group, rendering it underpowered to detect any association with other glycemic levels. On the other hand, the result may highlight the relevance of adding the 1-h glucose level to the revised World Health Organization diagnostic criteria.

The HAPO follow-up study from Belfast did not reveal any association between maternal hyperglycemia and childhood obesity and adiposity (17). The dissimilar findings may be because of different study designs and

interethnic differences in genetic and environmental factors. Overall, the children in the Belfast study were younger, with the youngest being 5 years old. As reported in a previous prospective study, the effect of maternal diabetes on later childhood abnormalities became evident only after the age of 5 years (10). In addition, our subjects were all Chinese, and thus our study results may not be generalizable to other ethnic groups. To this end, because the Hong Kong and the Belfast cohorts had ongoing follow-up studies of children at the same ages, comparisons between the outcomes of these two populations would be of interest.

Other than the limitations mentioned above, this study has several advantages in its design. The OGTT result during the index pregnancy remained undisclosed and the mothers received no antenatal treatment or postnatal intervention for their hyperglycemia. Children were assessed at the same age, with a 96% completion rate of the five-point OGTT with insulin levels. Our cohort also had available comprehensive data from during pregnancy and at delivery, and we had children's dietary histories and exercise levels available for adjustment for various confounders.

In summary, in this follow-up study of the HAPO cohort, we observed that maternal hyperglycemia increased the risk of abnormal glucose tolerance, obesity, and hypertension among offspring in early childhood, independent of maternal obesity, being large for gestational age at birth, and childhood obesity. Despite the low frequency of abnormal glucose tolerance among children of this young age, this cardiometabolic risk might continue to increase throughout adolescence into adulthood. A multicenter

follow-up study of offspring (aged 8–12 years) of mothers recruited from 10 of the original 15 HAPO study centers is under way. While this larger-scale multiethnic study will shed light on the long-term consequences of GDM, our data emphasize the need to follow up with offspring of mothers with GDM who are at risk for reduced  $\beta$ -cell function and abnormal glucose tolerance, especially in Asia, where GDM, childhood obesity, young-onset DM, and premature chronic diseases are rampant (36,37).

**Acknowledgments.** The authors thank the HAPO study steering committee for initiating and conducting the original study and for their kind help and support, especially Dr. Boyd Metzger and Dr. Alan Dye, who helped with the review of the manuscript. The authors also thank the participants for their contribution.

**Funding.** The HAPO study was funded by the National Institute of Child Health and Human Development (grant R01-HD34242) and the National Institute of Diabetes and Digestive and Kidney Diseases (grant R01-HD34243). The HAPO follow-up study in the Hong Kong Center was supported by funding from the Research Grants Council of the Hong Kong SAR, China (grants CUHK 473408 and, in part, CUHK 471713).

**Duality of Interest.** No potential conflicts of interest relevant to this article were reported.

**Author Contributions.** W.H.T. designed the study, researched and analyzed data, and wrote the manuscript. R.C.W.M. designed the study, researched data, and edited the manuscript. R.O. researched data and contributed to the discussion. A.M.L., T.T.H.L., and J.C.N.C. contributed to the discussion and edited the manuscript. M.H.M.C. and C.S.H. researched data and reviewed the manuscript. L.Y.Y. researched and analyzed data and wrote the manuscript. X.Y. and G.E.T. analyzed data and reviewed the manuscript. W.H.T. is the guarantor of this work and, as such, had full access to all the data in the study and takes responsibility for the integrity of the data and the accuracy of the data analysis.

## References

- Moyer VA; U.S. Preventive Services Task Force. Screening for gestational diabetes mellitus: U.S. Preventive Services Task Force recommendation statement. *Ann Intern Med* 2014; 160:414–420
- Pirc LK, Owens JA, Crowther CA, Willson K, De Blasio MJ, Robinson JS. Mild gestational diabetes in pregnancy and the adipoinular axis in babies born to mothers in the ACHOIS randomised controlled trial. *BMC Pediatr* 2007;7:18
- Landon MB, Rice MM, Varner MW, et al.; Eunice Kennedy Shriver National Institute of Child Health and Human Development Maternal-Fetal Medicine Units (MFMU) Network. Mild gestational diabetes mellitus and long-term child health. *Diabetes Care* 2015;38:445–452
- Pettitt DJ, Aleck KA, Baird HR, Carraher MJ, Bennett PH, Knowler WC. Congenital susceptibility to NIDDM. Role of intrauterine environment. *Diabetes* 1988;37:622–628
- Pettitt DJ, Baird HR, Aleck KA, Bennett PH, Knowler WC. Excessive obesity in offspring of Pima Indian women with diabetes during pregnancy. *N Engl J Med* 1983;308:242–245
- Dabelea D, Hanson RL, Lindsay RS, et al. Intrauterine exposure to diabetes conveys risks for type 2 diabetes and obesity: a study of discordant sibships. *Diabetes* 2000;49:2208–2211
- Harder T, Plagemann A. A role for gestational diabetes in the excess maternal transmission of type 2 diabetes? *Diabetes Care* 2000;23:431–432
- Plagemann A, Harder T, Kohlhoff R, Rohde W, Dörner G. Glucose tolerance and insulin secretion in children of mothers with pregestational IDDM or gestational diabetes. *Diabetologia* 1997;40:1094–1100
- Van Assche FA, Aerts L, Holemans K. The effects of maternal diabetes on the offspring. *Baillieres Clin Obstet Gynaecol* 1991;5:485–492
- Krishnaveni GV, Hill JC, Leary SD, et al. Anthropometry, glucose tolerance, and insulin concentrations in Indian children: relationships to maternal glucose and insulin concentrations during pregnancy. *Diabetes Care* 2005;28:2919–2925
- Hillier TA, Pedula KL, Schmidt MM, Mullen JA, Charles MA, Pettitt DJ. Childhood obesity and metabolic imprinting: the ongoing effects of maternal hyperglycemia. *Diabetes Care* 2007; 30:2287–2292
- Tam WH, Ma RC, Yang X, et al. Glucose intolerance and cardiometabolic risk in children exposed to maternal gestational diabetes mellitus in utero. *Pediatrics* 2008;122:1229–1234
- Vääräsmäki M, Pouta A, Elliot P, et al. Adolescent manifestations of metabolic syndrome among children born to women with gestational diabetes in a general-population birth cohort. *Am J Epidemiol* 2009;169:1209–1215
- Krishnaveni GV, Veena SR, Hill JC, Kehoe S, Karat SC, Fall CH. Intrauterine exposure to maternal diabetes is associated with higher adiposity and insulin resistance and clustering of cardiovascular risk markers in Indian children. *Diabetes Care* 2010;33:402–404
- Tam WH, Ma RC, Yang X, et al. Glucose intolerance and cardiometabolic risk in adolescents exposed to maternal gestational diabetes: a 15-year follow-up study. *Diabetes Care* 2010;33:1382–1384
- Kubo A, Ferrara A, Windham GC, et al. Maternal hyperglycemia during pregnancy predicts adiposity of the offspring. *Diabetes Care* 2014; 37:2996–3002
- Thaware PK, McKenna S, Patterson CC, Hadden DR, Pettitt DJ, McCance DR. Untreated mild hyperglycemia during pregnancy and anthropometric measures of obesity in offspring at age 5–7 years. *Diabetes Care* 2015;38:1701–1706
- Pettitt DJ, McKenna S, McLaughlin C, Patterson CC, Hadden DR, McCance DR. Maternal glucose at 28 weeks of gestation is not associated with obesity in 2-year-old offspring: the Belfast Hyperglycemia and Adverse Pregnancy Outcome (HAPO) family study. *Diabetes Care* 2010;33:1219–1223
- Wright CS, Rifas-Shiman SL, Rich-Edwards JW, Taveras EM, Gillman MW, Oken E. Intrauterine exposure to gestational diabetes, child adiposity, and blood pressure. *Am J Hypertens* 2009;22:215–220
- Clausen TD, Mathiesen ER, Hansen T, et al. High prevalence of type 2 diabetes and pre-diabetes in adult offspring of women with gestational diabetes mellitus or type 1 diabetes: the role of intrauterine hyperglycemia. *Diabetes Care* 2008;31:340–346
- Clausen TD, Mathiesen ER, Hansen T, et al. Overweight and the metabolic syndrome in adult offspring of women with diet-treated gestational diabetes mellitus or type 1 diabetes. *J Clin Endocrinol Metab* 2009;94:2464–2470
- Donovan LE, Cundy T. Does exposure to hyperglycaemia in utero increase the risk of obesity and diabetes in the offspring? A critical reappraisal. *Diabet Med* 2015;32:295–304
- HAPO Study Cooperative Research Group; Metzger BE, Lowe LP, Dyer AR, et al. Hyperglycemia and adverse pregnancy outcomes. *N Engl J Med* 2008;358:1991–2002
- Godin G, Shephard RJ. A simple method to assess exercise behavior in the community. *Can J Appl Sport Sci* 1985;10:141–146
- Hui SC, Chan CM, Wong SHS, Ha ASC, Hong Y. Physical activity levels of Chinese youths and its association with physical fitness and demographic variables: the Hong Kong Youth Fitness Study. *Res Q Exerc Sport* 2001;72(Suppl.):A92–A93
- Diagnostic criteria and classification of hyperglycaemia first detected in pregnancy: a World Health Organization Guideline. *Diabetes Res Clin Pract* 2014;103:341–363
- Matsuda M, DeFronzo RA. Insulin sensitivity indices obtained from oral glucose tolerance testing: comparison with the euglycemic insulin clamp. *Diabetes Care* 1999;22:1462–1470
- Stumvoll M, Mitrakou A, Pimenta W, et al. Use of the oral glucose tolerance test to assess insulin release and insulin sensitivity. *Diabetes Care* 2000;23:295–301
- Matthews DR, Hosker JP, Rudenski AS, Naylor BA, Treacher DF, Turner RC. Homeostasis model assessment: insulin resistance and beta-cell function from fasting plasma glucose and insulin concentrations in man. *Diabetologia* 1985;28:412–419
- National High Blood Pressure Education Program Working Group on High Blood Pressure in Children and Adolescents. The fourth report on the diagnosis, evaluation, and treatment of high blood pressure in children and adolescents. *Pediatrics* 2004;114(Suppl. 2):555–576
- Abdul-Ghani MA, Williams K, DeFronzo RA, Stern M. What is the best predictor of future type 2 diabetes? *Diabetes Care* 2007;30:1544–1548

32. Leung SSF, Cole TJ, Tse LY, Lau JTF. Body mass index reference curves for Chinese children. *Ann Hum Biol* 1998;25:169–174
33. Regnault N, Gillman MW, Rifas-Shiman SL, Eggleston E, Oken E. Sex-specific associations of gestational glucose tolerance with childhood body composition. *Diabetes Care* 2013;36:3045–3053
34. Lingwood BE, Henry AM, d’Emden MC, et al. Determinants of body fat in infants of women with gestational diabetes mellitus differ with fetal sex. *Diabetes Care* 2011;34:2581–2585
35. Bahado-Singh RO, Mele L, Landon MB, et al.; Eunice Kennedy Shriver National Institute of Child Health and Human Development Maternal-fetal Medicine Units Network. Fetal male gender and the benefits of treatment of mild gestational diabetes mellitus. *Am J Obstet Gynecol* 2012;206:422.e1–e5.
36. Chan JC, Malik V, Jia W, et al. Diabetes in Asia: epidemiology, risk factors, and pathophysiology. *JAMA* 2009;301:2129–2140
37. Yeung RO, Zhang Y, Luk A, et al. Metabolic profiles and treatment gaps in young-onset type 2 diabetes in Asia (the JADE programme): a cross-sectional study of a prospective cohort. *Lancet Diabetes Endocrinol* 2014;2:935–943
